# Supplementary material
Source: PubMed Central journal article supplement (PMC4585464)
Supplement: embj0034-2291-sd1.pdf [file embj0034-2291-sd1.pdf]

Triggered  $\text{Ca}^{2+}$  influx is required for extended-synaptotagmin 1-induced ER-plasma membrane tethering

## Appendix

### Table of Contents

1. Appendix Figure S1
2. Appendix Figure S2
3. Appendix Figure S3
4. Appendix Figure legends

**A**

| Fusion protein             | MW      |
|----------------------------|---------|
| mCh-E-Syt1:                | 151 kDa |
| mCh-E-Syt1-SMP-C2ABCDE:    | 141 kDa |
| mCh-E-Syt1( $\Delta$ SMP): | 125 kDa |
| mCh-E-Syt1-C2ABCDE:        | 116 kDa |
| mCh-E-Syt1-C2ABCD:         | 101 kDa |
| mCh-E-Syt1-C2AB:           | 64 kDa  |
| mCh-E-Syt1-C2CD:           | 73 kDa  |
| mCh-E-Syt1-C2C:            | 53 kDa  |
| mCh-E-Syt1-C2E:            | 53 kDa  |
| mCh-Syt1-C2AB:             | 66 kDa  |
| mCherry:                   | 27 kDa  |
| E-Syt1:                    | 121 kDa |

**B**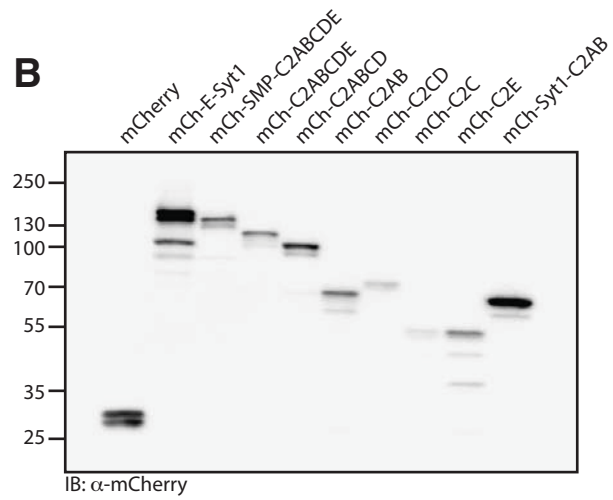**C**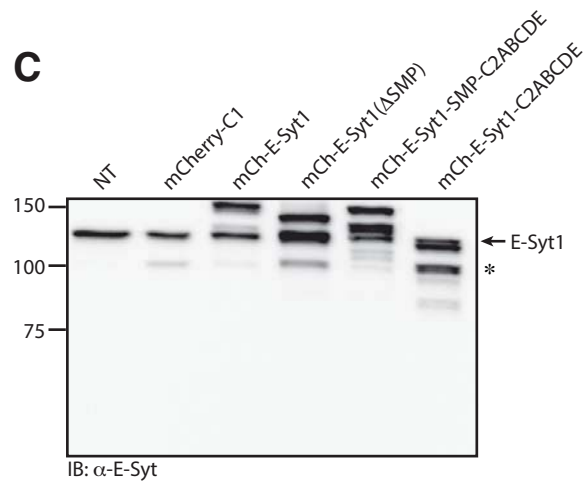

# Appendix Figure S1

Idevall-Hagren et al

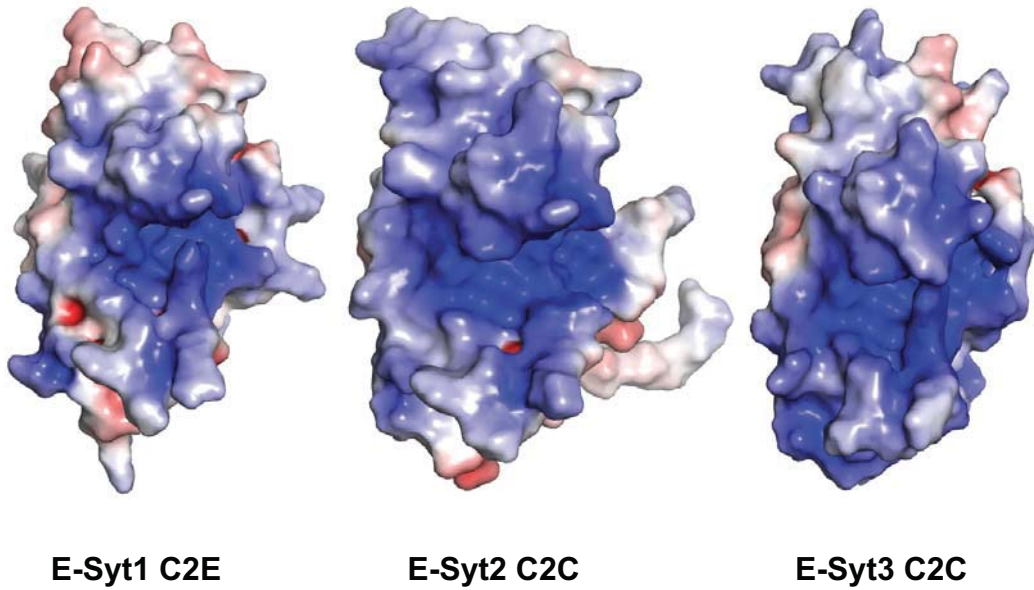

# Appendix Figure S2

Idevall-Hagren et al

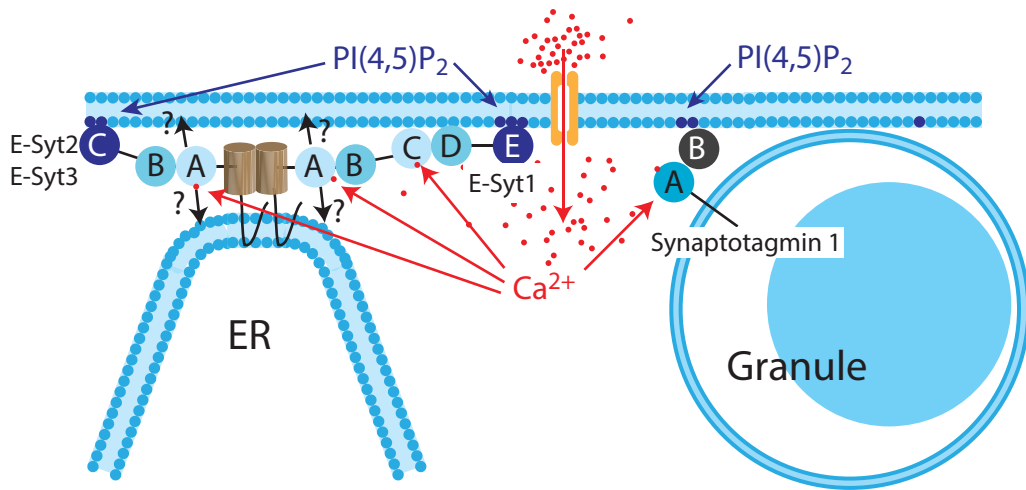

# Appendix Figure S3

Idevall-Hagren et al

**Appendix Figure S1 (relates to Figures 1-3). Western blot detection of exogenously expressed proteins in HeLa cells.**

**A.** Predicted molecular weights of mCherry and the mCherry fusion proteins used in the study.

**B.** Western blot detection of mCherry immunoreactivity in HeLa cell lysates.

**C.** Western blot detection of E-Syt1 immunoreactivity in lysates of HeLa cells expressing the indicated mCherry fusion proteins. NT – non-transfected, \* denotes non-specific band.

**Appendix Figure S2 (relates to figure 2). Modeling of the C-terminal domains of the E-Syts.**

Surface electrostatic potential of human E-Syt1 C2E, E-Syt2 C2C (PDB code 2DMG) and E-Syt3 C2C domains. Positive potential is shown in blue and negative potential in red. Three dimensional models of E-syt1 C2E and E-yt3 C2C domains were generated by Phyre2 (Kelley & Sternberg, 2009).

**Appendix Figure S3. Proposed model for Ca<sup>2+</sup>-induced recruitment of E-Syt1 to the plasma membrane.** In excitable cells, Ca<sup>2+</sup> influx through voltage-regulated Ca<sup>2+</sup> channels results in exocytosis, triggered by the interaction between secretory vesicle-localized synaptotagmin-1 and plasma membrane PI(4,5)P<sub>2</sub>. In addition, this stimulus results in E-Syt1/2 recruitment to the plasma membrane. Cooperativity between the Ca<sup>2+</sup>-binding C2C domain and the PI(4,5)P<sub>2</sub>-binding C2E domain of E-Syt1 are key to this interaction. The C2A domain of both E-Syt1 and E-Syt2/3 also contains a Ca<sup>2+</sup> binding site that stimulates binding to lipid bilayers but does not require acidic phospholipids in the bilayer (Xu et al, 2014). Whether this domain binds to the plasma membrane *in trans* or to the ER *in cis* remains unclear (“?”).

**References**

Kelley LA, Sternberg MJ (2009) Protein structure prediction on the Web: a case study using the Phyre server. *Nature protocols* 4: 363-371

Xu J, Bacaj T, Zhou A, Tomchick DR, Sudhof TC, Rizo J (2014) Structure and Ca(2)(+)-binding properties of the tandem C(2) domains of E-Syt2. *Structure* 22: 269-280
