# Supplementary material
Source: PubMed Central journal article supplement (PMC4585464)
Supplement: embj0034-2291-sd2.pdf [file embj0034-2291-sd2.pdf]

## Expanded View Figures

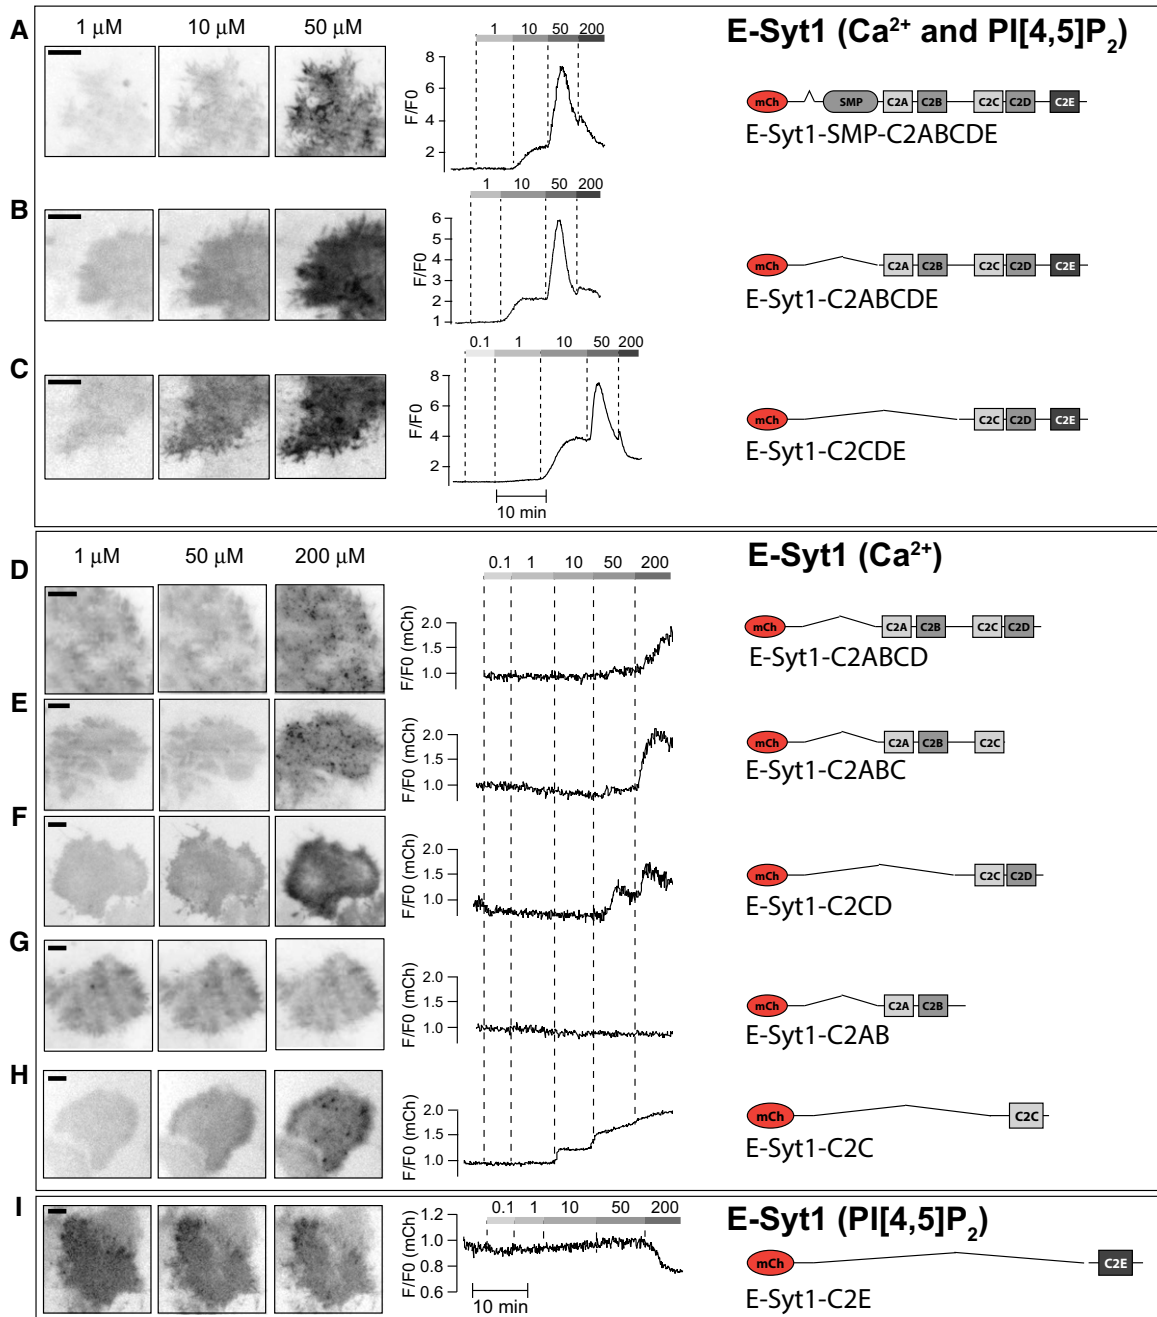

**Figure EV1. Contribution of the different C2 domains to E-Syt1 plasma membrane binding (relates to Figure 2).**

A–C TIRF micrographs (left) and single-cell TIRF recordings of mCherry fluorescence for the indicated E-Syt1 domain deletion protein binding the plasma membrane PI(4,5)P<sub>2</sub> in a Ca<sup>2+</sup>-dependent manner.

D–H TIRF micrographs (left) and single-cell TIRF recordings of mCherry fluorescence for the indicated E-Syt1 domain deletion protein binding the plasma membrane in a PI(4,5)P<sub>2</sub>-independent and Ca<sup>2+</sup>-dependent manner.

I TIRF micrographs (left) and single-cell TIRF recording of mCherry fluorescence for the indicated E-Syt1 domain deletion protein binding the plasma membrane in a PI(4,5)P<sub>2</sub>-dependent and Ca<sup>2+</sup>-independent manner.

Data information: The clustering or aggregation of fluorescent protein seen in (D, E and H) is only observed at 200 μM Ca<sup>2+</sup> and reflects cytosolic aggregates. All scale bars, 10 μm.

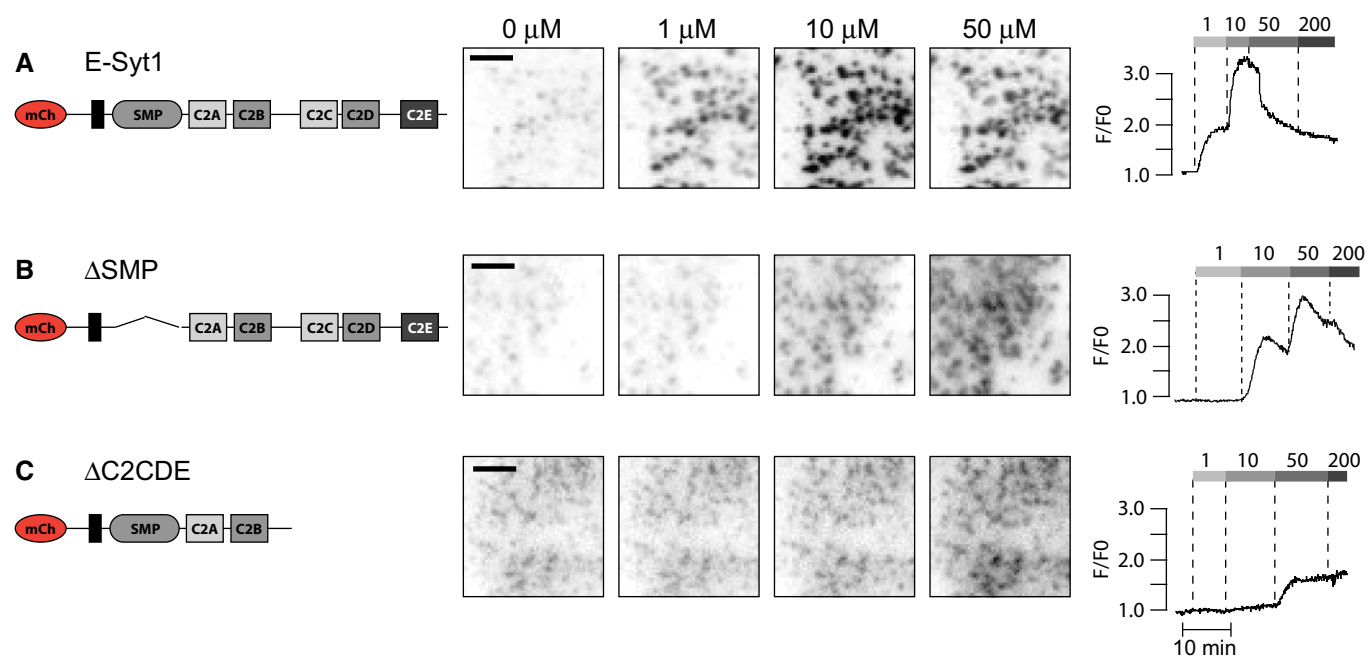

**Figure EV2. Contribution of the SMP domain to E-Syt1 plasma membrane binding (relates to Figure 3).**

A–C TIRF micrographs (left) and single-cell TIRF recordings of mCherry fluorescence (right) for the indicated, ER-localized E-Syt1 domain deletion proteins. All scale bars, 2 μm.

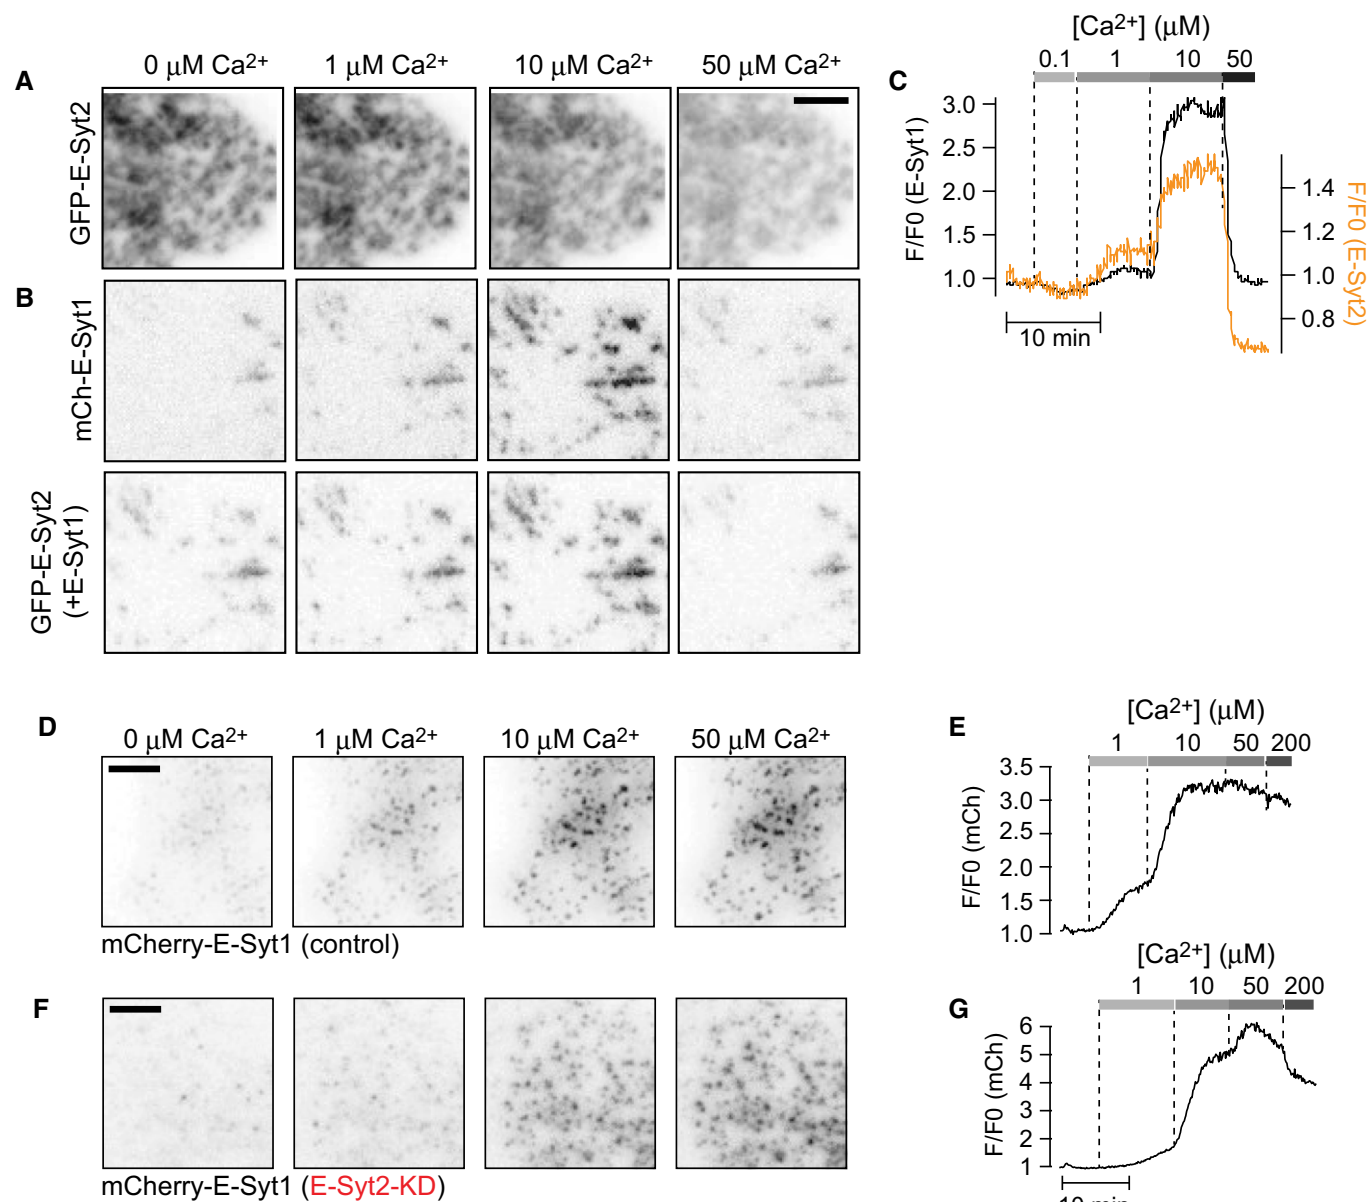

**Figure EV3. E-Syt1-E-Syt2 heterodimerization has an impact on plasma membrane binding (relates to Figure 3).**

A, B TIRF micrographs of GFP-E-Syt2 (A) or GFP-E-Syt2 and mCherry-E-Syt1 (B) fluorescence from a permeabilized cell exposed to buffers with the indicated Ca<sup>2+</sup> concentrations.

C Single-cell TIRF recording of mCherry-E-Syt1 (black) and GFP-E-Syt2 (yellow) fluorescence following exposure to buffers with the indicated Ca<sup>2+</sup> concentrations.

D, E TIRF micrographs (D) and single-cell TIRF recording (E) of mCherry-E-Syt1 fluorescence in control cells after permeabilization and exposure to buffers with the indicated Ca<sup>2+</sup> concentrations.

F, G TIRF micrographs (F) and single-cell TIRF recording (G) of mCherry-E-Syt1 fluorescence in E-Syt2 knockdown cells after permeabilization and exposure to buffers with the indicated Ca<sup>2+</sup> concentrations.

Data information: All scale bars, 2 μm.

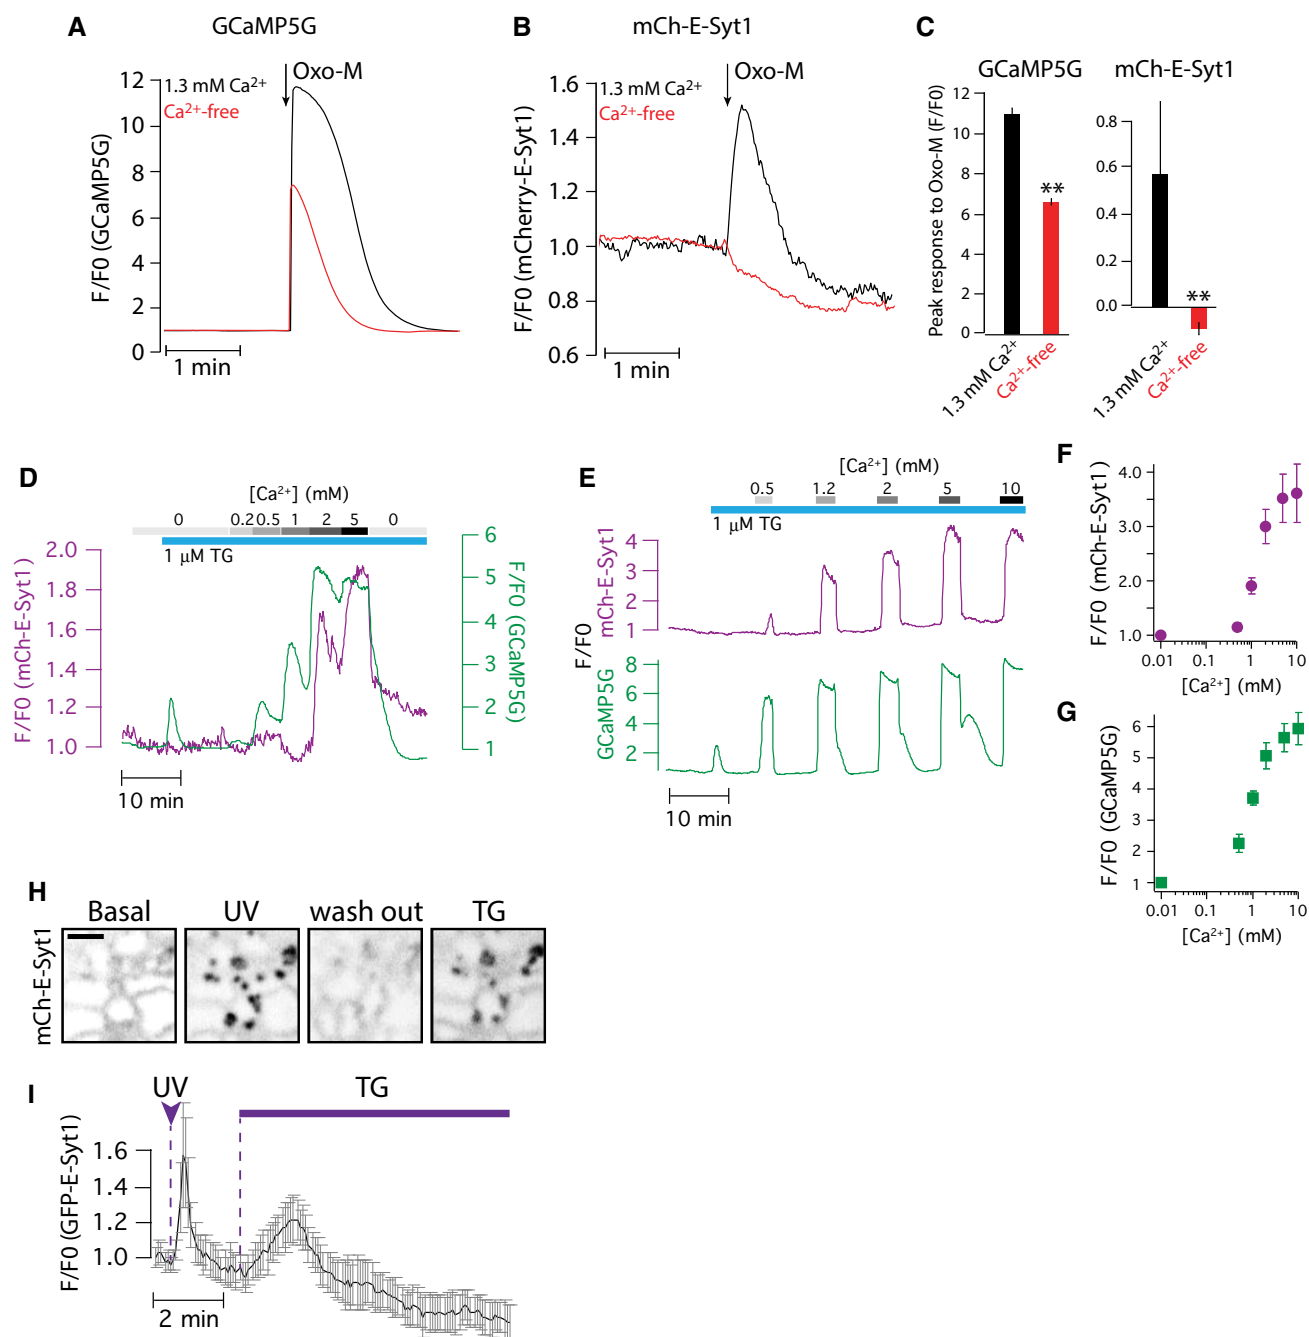

**Figure EV4. E-Syt1 PM binding requires triggered  $\text{Ca}^{2+}$  influx (relates to Figure 4).**

- A, B TIRF microscopy recordings of GCaMP5G (A) and mCherry-E-Syt1 (B) fluorescence following stimulation with 10  $\mu\text{M}$  oxo-M, in the absence (red) or presence (black) of extracellular  $\text{Ca}^{2+}$ . The HeLa cells also overexpressed an M1 muscarinic receptor.
- C Quantification of the peak  $\text{Ca}^{2+}$  increase (left) and E-Syt1 PM binding (right) from the experiments in (A) and (B). Data show means  $\pm$  SEM for 19 cells from 3 separate experiments (\*\* $p < 0.01$  for difference from 1.3 mM  $\text{Ca}^{2+}$ ).
- D, E TIRF microscopy recordings of GCaMP5G (green) and mCherry-E-Syt1 (purple) fluorescence following exposure to 1  $\mu\text{M}$  thapsigargin in the absence of extracellular  $\text{Ca}^{2+}$ , followed by the addition of  $\text{Ca}^{2+}$  at different concentrations (0.2–10 mM).
- F, G Quantification of the peak fluorescence increase in mCherry-E-Syt1 (F) and GCaMP5G (G) measured by TIRF microscopy in response to the application of the indicated  $\text{Ca}^{2+}$  concentration in the presence of 1  $\mu\text{M}$  thapsigargin. Data show means  $\pm$  SEM for 19 cells from 4 experiments.
- H Confocal micrographs of mCherry-E-Syt1 fluorescence from a HeLa cell maintained in a  $\text{Ca}^{2+}$ -containing buffer and exposed to flash photolysis of caged  $\text{Ca}^{2+}$  and subsequent addition of 1  $\mu\text{M}$  thapsigargin (TG). Scale bar, 1  $\mu\text{m}$ .
- I Means  $\pm$  SEM ( $n = 4$  cells from 2 experiments) of mCherry-E-Syt1 fluorescence change at ER-PM contacts following flash photolysis of  $\text{Ca}^{2+}$  and subsequent addition of 1  $\mu\text{M}$  thapsigargin (TG).

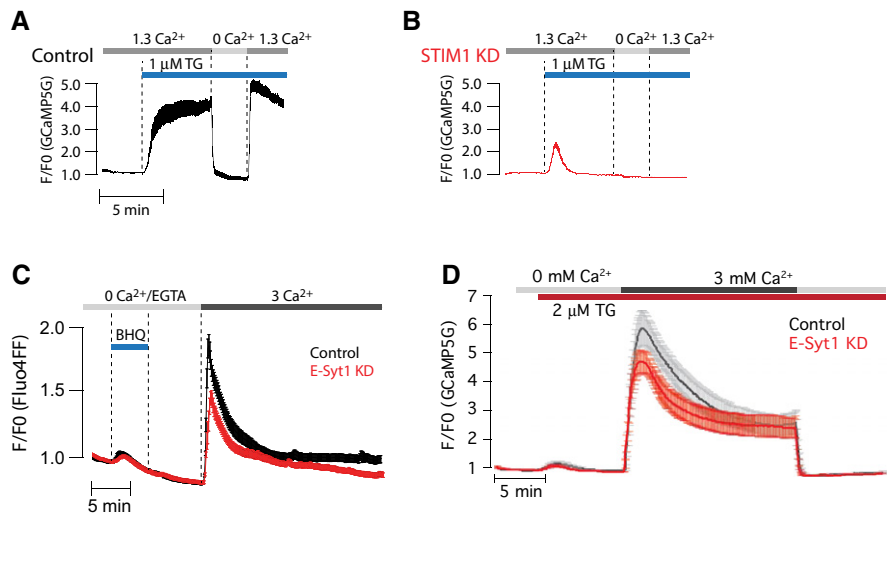

**Figure EV5. E-Syt1 knockdown has little impact on SOCE (relates to Figure 4).**  
 A, B TIRF microscopy recordings of GCaMP5G fluorescence in response to 1 μM thapsigargin (TG) in control (A, black) and STIM1 siRNA-treated (B, red) HeLa cells (means ± SEM for 31 (control) and 28 (STIM1 KD) cells in 3 separate experiments).  
 C Ca<sup>2+</sup> imaging of control or E-Syt1 KD HeLa cells loaded with the low-affinity Ca<sup>2+</sup> indicator Fluo-4FF during release of Ca<sup>2+</sup> from the ER and activation of SOCE. Curves are presented as means ± SEM for 38 (control, red) and 33 (E-Syt1 KD, black) cells from 4 separate experiments.  
 D Fluorescence microscopy recordings of GCaMP5G fluorescence in control or E-Syt1 knockdown HeLa cells exposed to 1 μM thapsigargin (TG) in Ca<sup>2+</sup>-free buffer, followed by the re-addition of 3 mM Ca<sup>2+</sup>. Data are presented as means ± SEM for 21 (control) and 23 (E-Syt1-KD) cells from 3 experiments.

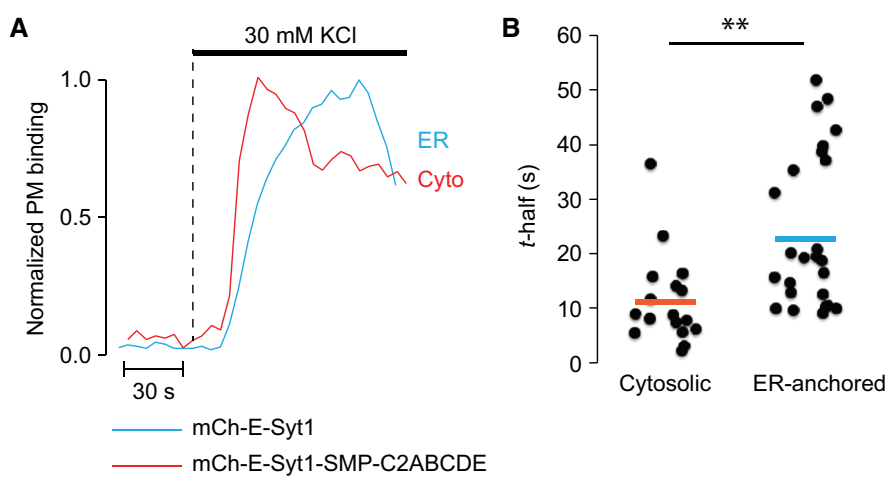

**Figure EV6. Different PM-binding kinetics of cytosolic and ER-localized E-Syt1.**  
 A Representative TIRF microscopy recordings from two MING cells expressing mCherry-E-Syt1 (blue) or mCherry-E-Syt1-SMP-C2ABCDE (red) following depolarization with 30 mM K<sup>+</sup>.  
 B Scatter plot showing time to half-maximal PM binding for cells stimulated as in (A). N = 17 cells (mCherry-E-Syt1) and N = 24 cells (mCherry-E-Syt1-SMP-C2ABCDE) from 2 separate experiments (\*\*P < 0.01).
